# Supplementary material for: D-Xylose Blocks the Broad Negative Regulation of XylR on Lipid Metabolism and Affects Multiple Physiological Characteristics in Mycobacteria
Source: MDPI journal article supplement (doi:10.3390/ijms24087086), 2023-04-11
Supplement: s1 [file s1]

# D-Xylose Blocks the Broad Negative Regulation of XylR on Lipid Metabolism and Affects Multiple Physiological Characteristics in Mycobacteria

Kun Wang <sup>†</sup>, Xujie Cui <sup>†</sup>, Xiaocui Ling, Jiarui Chen, Jiachen Zheng, Yuling Xiang and Weihui Li <sup>\*</sup>

State Key Laboratory for Conservation and Utilization of Subtropical Agro-Bioresources, College of Life Science and Technology, Guangxi University, Nanning 530004, China; 2008401012@st.gxu.edu.cn (K.W.); 2208391004@st.gxu.edu.cn (X.C.); lingxiaocui2017@163.com (X.L.); chenjiarui@genomics.cn (J.C.); zjc13737366820@163.com (J.Z.); xyl9724@163.com (Y.X.)

<sup>\*</sup> Correspondence: lwahlbx@163.com; Tel.: +86-771-285-2965

<sup>†</sup> These authors contributed equally to this work.

## A list of the supplemental materials:

**Figure S1.** Bacterial one-hybrid assay for XylR and *xylRp* interaction.

**Figure S2.** EMSA assays for XylR binding to DNA substrates of mutant IR sequence.

**Figure S3.** The assays of  $\beta$ -galactosidase activity.

**Figure S4.** ITC assays for interaction between XylR and L-Ara.

**Figure S5.** The assays for the growths of wildtype and recombinant *M. smegmatis* strains under the induction of D-xylose.

**Table S1.** Transcriptomic assays for the differential gene expression of the *xylR*-overexpressing compared to the Msm/pMV261 strain (provided as an Excel table, separately)

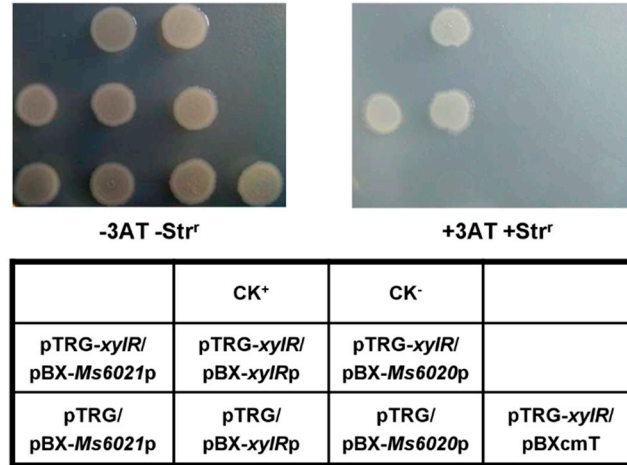

**Figure S1.** Bacterial one-hybrid assay for XylR and *xyIRp* interaction. A pair of pBXcmT/pTRG plasmids was co-transformed into the reporter strain and its growth was monitored together with that of the self-activation controls on selective medium. Co-transformants containing the pBX-*Rv2031*/pTRG-*Rv3133c* plasmids served as positive controls (CK<sup>+</sup>) and co-transformants containing the empty vectors pBX and pTRG served as negative controls (CK<sup>-</sup>).

**A**

*xyIRp1* TTGAACCACATCTTATGTTCTGCGAGAGAACAATAACAACCTC  
*xyIRp2* TTGAACCACATCGGCCACCTGTCGAGAGAACAATAACAACCTC  
*xyIRp3* TTGAACCACATCTTATGTTCTGCGAGAACCTCCGGTACAACCTC  
*xyIRp4* TTGAACCACATCGGCCACCTGTCGAGAACCTCCGGTACAACCTC  
*xyIRp5* TTGAACCACATCTTATGTTCTACATCTGGAACAATAACAACCTC  
*xyIRp6* TTGAACCACATCGCATGTTCTGCGAGAGAACAACGTACAACCTC  
*xyIRp7* TTGAACCACATCGCCTGTTCTGCGAGAGAACAACCGTACAACCTC  
*xyIRp8* TTGAACCACATCTTATGCCAGTCGAGAACCCAAATAACAACCTC  
*xyIRp9* TTGAACCACATCTTATGTGTCAGTCGAGAACCAATAACAACCTC  
*xyIRp10* TTGAACCACATCTTATGTTCTGAGAACAATAACAACCTC

**B**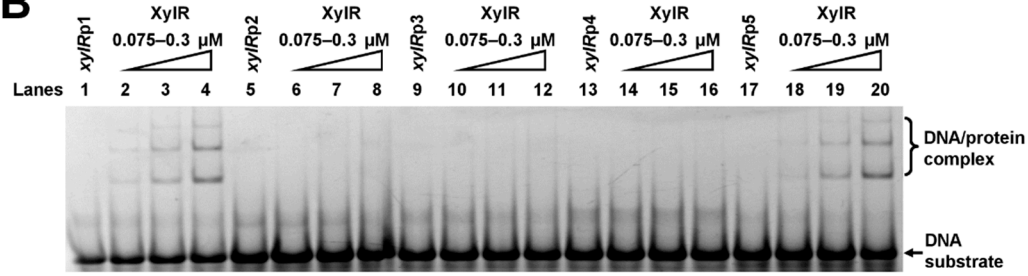**C**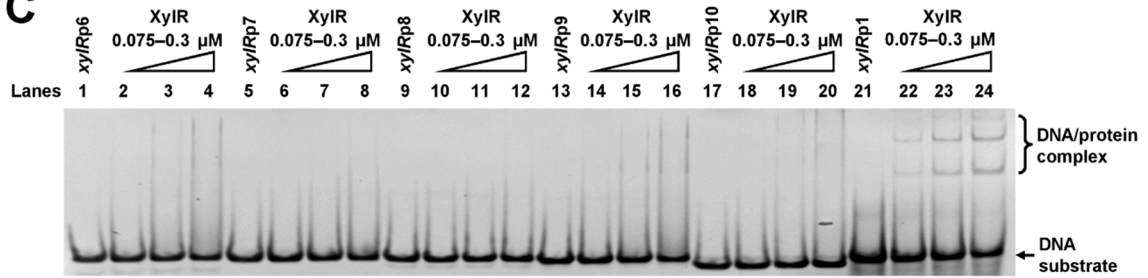

**Figure S2.** EMSA assays for XylIR binding to DNA substrates of mutant IR sequence. (A) The wild-type IR sequence (*xyIRp1*) and mutated sequences (*xyIRp2*-*p10*) were listed. The DNA-binding activity of XylIR on wild-type IR sequence (lanes 1-4) (B) and mutated sequences (lanes 5-20) (B), (lanes 1-20) (C) were shown in figures. The DNA substrates were co-incubated with 0.075-0.3 μM of XylIR protein.

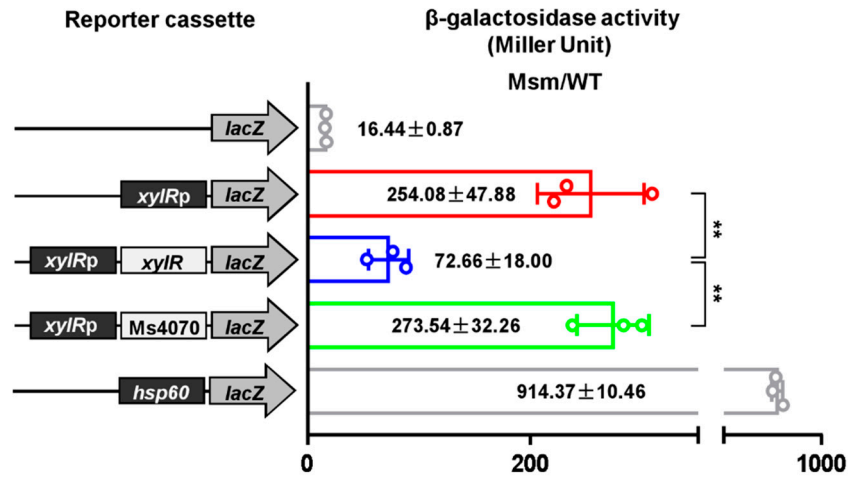

**Figure S3.** The assays of  $\beta$ -galactosidase activity. The effect of XylR on the gene expression was assayed by constructing a series of *lacZ* alone or promoter-*lacZ* and promoter-*xylR-lacZ* co-expression plasmids. These plasmids were transformed into Msm/WT strains. The activity of  $\beta$ -galactosidase was further examined and presented as Miller units (right panel). Left column: schematic representation of each clone used to generate recombinant strains. Null promoter-*lacZ*, *xylRp-Ms4070-lacZ* and *hsp60-lacZ* were used as controls. Right column:  $\beta$ -galactosidase activity was expressed as Miller units. The values presented were the averages of three independent experiments. For statistical analysis, two-way analysis of variance with Bonferroni multiple comparison tests were performed using a *P*-value of  $< 0.01$ . The *P*-values of the results ( $< 0.01$ ) are indicated by two asterisk (\*\*) on top of the column in the figure.

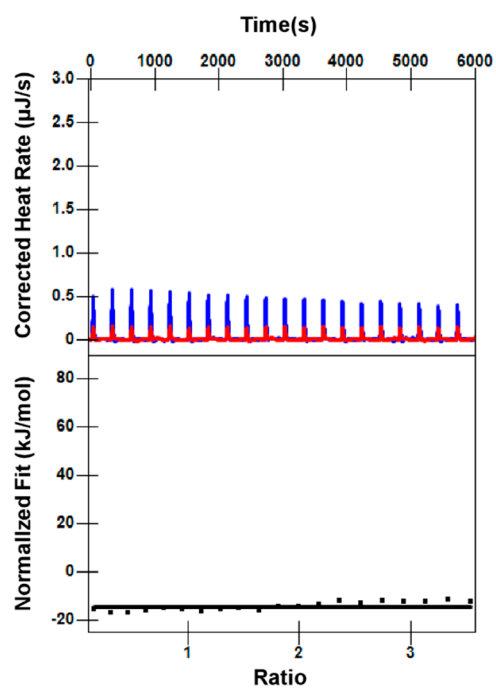

**Figure S4.** ITC assays for interaction between XylR and L-Ara. Original titration data and integrated heat measurements are shown in the upper and lower plots, respectively.

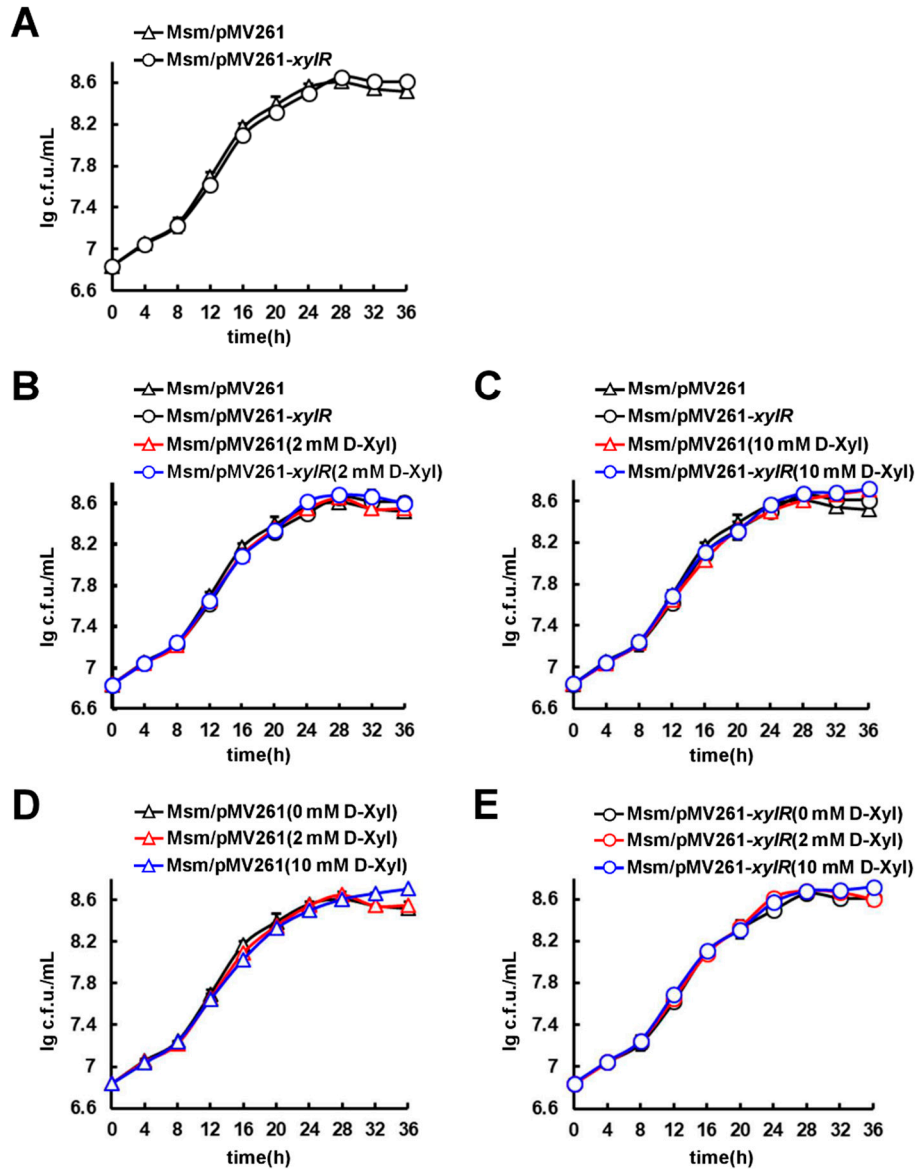

**Figure S5.** The assays for the growths of wildtype and recombinant *M. smegmatis* strains under the induction of D-xylose. Growth curves of the recombinant *M. smegmatis* strains were determined as described in ‘Materials and Methods’ section. The *xylR*-overexpression and wild-type strains (**A**) were grown in 7H9 medium without antibiotic stress and no obvious growth difference was observed. When 2 or 10 mM D-xylose was added into the medium as a stress inducer, no growth difference between the wild type *M. smegmatis* and *xylR*-overexpression strains (**B-E**).
